# Supplementary material for: Electrolyte anion-assisted charge transportation in poly(oxoammonium cation/nitroxyl radical) redox gels
Source: Royal Society of Chemistry journal article supplement (doi:10.1039/c2jm31907a), 2012-01-01
Supplement: c2jm31907a.pdf [file c2jm31907a.pdf]

# Electrolyte Anion-Assisted Charge Transportation in Poly(oxoammonium cation/nitroxyl radical) Redox Gels

Kentaro Nakahara,<sup>a,b</sup> Kenichi Oyaizu<sup>a</sup> and Hiroyuki Nishide<sup>a\*</sup>

## Supporting Information

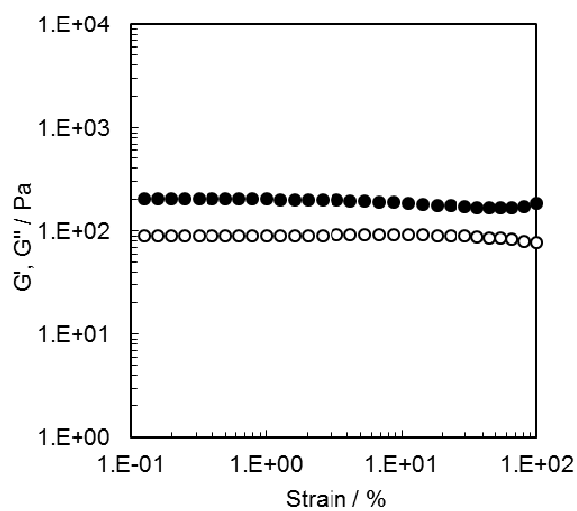

Figure S1. The modulus  $G'$ (●) and  $G''$ (○) vs. strain of a PTMA redox gel

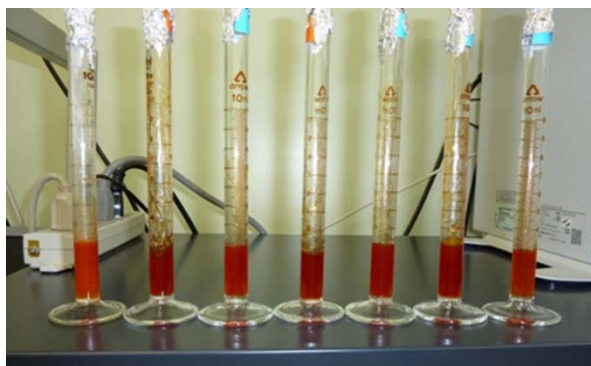

Figure S2. A picture of electrolyte-swelled PTMA redox gels

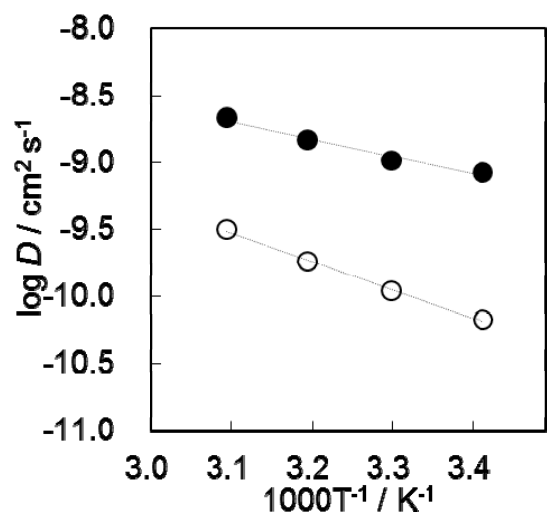

**Figure S3.** Arrhenius plots of diffusion constant obtained from the electrolyte-swelled cross-linked PTMA gels with the cross-linking degree of 1(●) and 4%(○). The gels were prepared with cross-linked PTMA and 1.0M  $\text{LiPF}_6$  in PC electrolyte.
